# Supplementary material
Source: MDPI journal article supplement (https://www.mdpi.com/2073-4344/11/5/615)
Supplement: s1 [file s1]

# Ex-LDH-Based Catalysts for CO<sub>2</sub> Conversion to Methanol and Dimethyl Ether

Mauro Mureddu <sup>1</sup>, Sarah Lai <sup>1</sup>, Luciano Atzori <sup>2</sup>, Elisabetta Rombi <sup>2</sup>, Francesca Ferrara <sup>1</sup>, Alberto Pettinau <sup>1</sup> and Maria Giorgia Cutrufello <sup>2,\*</sup>

<sup>1</sup> Sotacarbo S.p.A. – Grande Miniera di Serbariu, 09013 Carbonia, Italy; mauro.mureddu@sotacarbo.it (M.M.); sarah.lai@sotacarbo.it (S.L.); francesca.ferrara@sotacarbo.it (F.F.); alberto.pettinau@sotacarbo.it (A.P.)

<sup>2</sup> Dipartimento di Scienze Chimiche e Geologiche, Università di Cagliari – Complesso Universitario di Monserrato, 09042, Monserrato (CA), Italy; lucianoatzori@hotmail.it (L.A.); rombi@unica.it (E.R.)

\* Correspondence: gcutruffe@unica.it (M.G.C.)

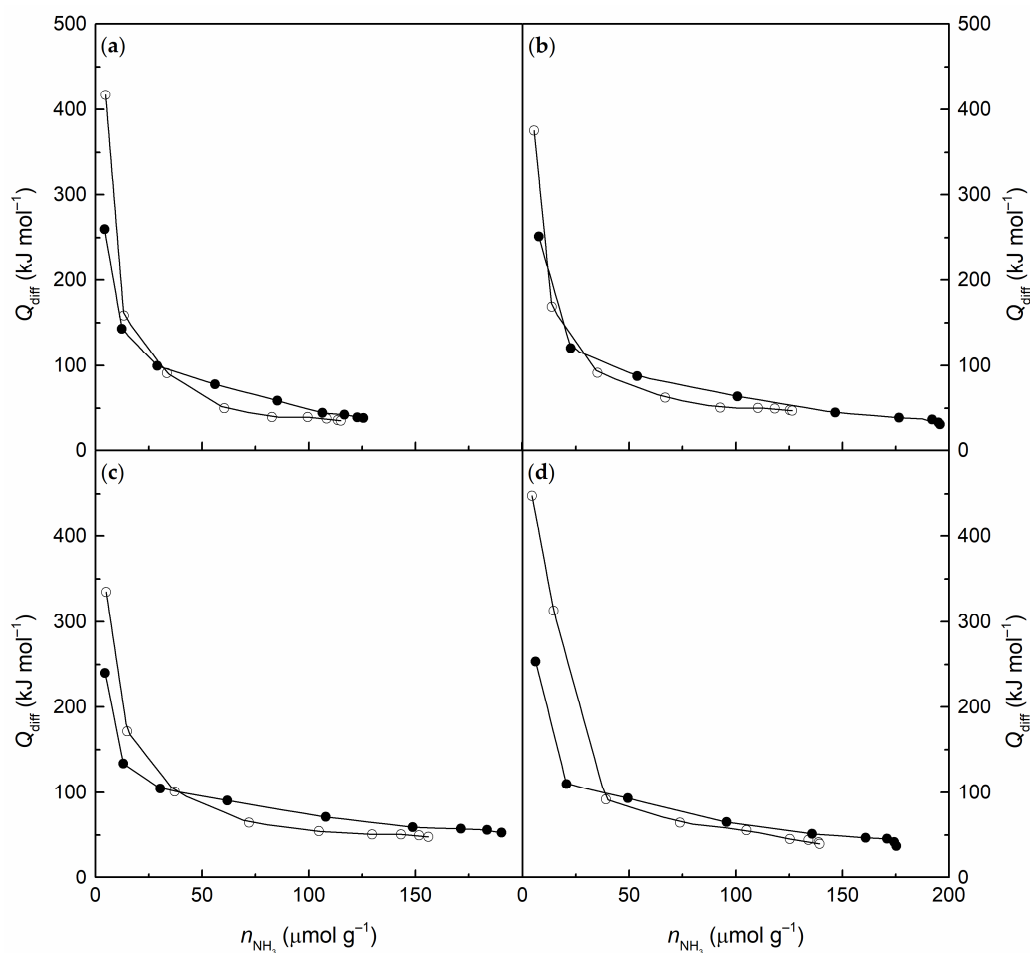

**Figure S1.** Differential heat of adsorption of NH<sub>3</sub> as a function of the amount of adsorbing sites for the ex-LDH samples as-prepared (○) and after H<sub>2</sub> treatment (●): (a) CuZnAl; (b) CuZnAlZr; (c) CuZnAlCe; (d) CuZnAlZrCe.

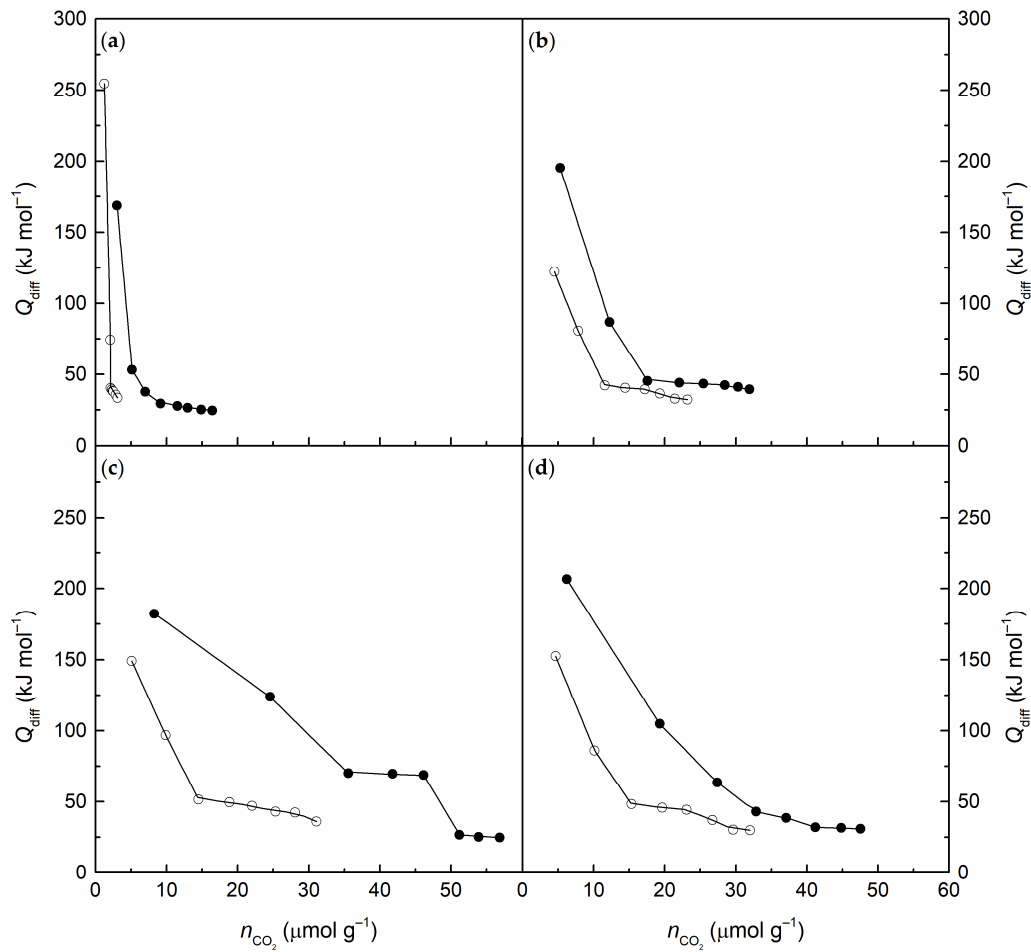

**Figure S2.** Differential heat of adsorption of CO<sub>2</sub> as a function of the amount of adsorbing sites for the ex-LDH samples as-prepared (○) and after H<sub>2</sub> treatment (●): (a) CuZnAl; (b) CuZnAlZr; (c) CuZnAlCe; (d) CuZnAlZrCe.

**Table S1.** Percentage of sites of different strength with respect to the total number and  $n_A/n_B$  ratios for the mixed oxides catalysts as-prepared and after H<sub>2</sub> treatment.

| Sample     |                        | $n_A$ distribution (%) |                         | $n_B$ distribution (%) |                         | $n_A/n_B$ ratio       |                           |
|------------|------------------------|------------------------|-------------------------|------------------------|-------------------------|-----------------------|---------------------------|
|            |                        | $n_{A,w}/n_{A,tot}$    | $n_{A,(m+s)}/n_{A,tot}$ | $n_{B,w}/n_{B,tot}$    | $n_{B,(m+s)}/n_{B,tot}$ | $n_{A,tot}/n_{B,tot}$ | $n_{A,(m+s)}/n_{B,(m+s)}$ |
| CuZnAl     | as-prep.               | 43                     | 57                      | 9                      | 91                      | 24.1                  | 15.0                      |
|            | H <sub>2</sub> -treat. | 65                     | 35                      | 43                     | 57                      | 11.7                  | 7.3                       |
| CuZnAlZr   | as-prep.               | 54                     | 46                      | 63                     | 37                      | 4.4                   | 5.3                       |
|            | H <sub>2</sub> -treat. | 62                     | 38                      | 62                     | 38                      | 3.8                   | 3.8                       |
| CuZnAlCe   | as-prep.               | 56                     | 44                      | 66                     | 34                      | 2.9                   | 3.7                       |
|            | H <sub>2</sub> -treat. | 71                     | 29                      | 41                     | 59                      | 2.9                   | 1.4                       |
| CuZnAlZrCe | as-prep.               | 55                     | 45                      | 64                     | 36                      | 3.4                   | 4.3                       |
|            | H <sub>2</sub> -treat. | 66                     | 34                      | 41                     | 59                      | 3.2                   | 1.9                       |

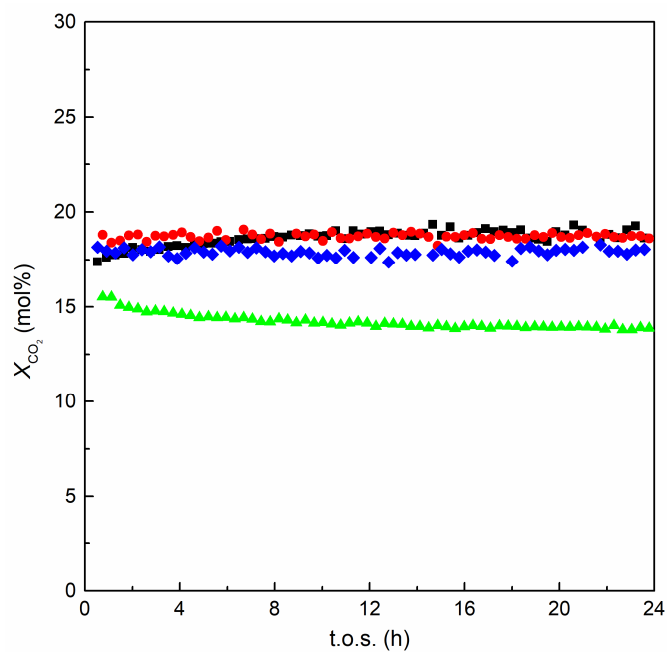

**Figure S3.** CO<sub>2</sub> conversion as a function of time on stream for the CO<sub>2</sub> hydrogenation to methanol on the ex-LDH catalysts: (■), CuZnAl; (●), CuZnAlZr; (▲), CuZnAlCe; (◆), CuZnAlZrCe. Reaction conditions:  $T = 250\text{ }^{\circ}\text{C}$ ;  $P = 3.0\text{ MPa}$ ;  $\text{H}_2/\text{CO}_2 = 3\text{ mol mol}^{-1}$ ;  $\text{GHSV} = 12000\text{ Ncm}^3\text{ g}_{\text{cat}}^{-1}\text{ h}^{-1}$ .

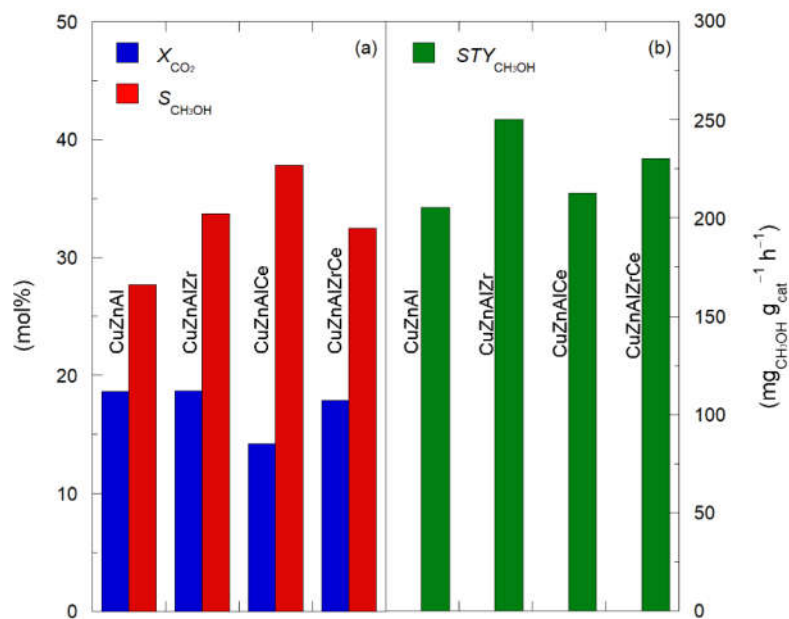

**Figure S4.** Catalytic results (average values over 24 hours on stream) for CO<sub>2</sub> hydrogenation to methanol on ex-LDH oxides. Reaction conditions:  $T = 250\text{ }^{\circ}\text{C}$ ;  $P = 3.0\text{ MPa}$ ;  $\text{H}_2/\text{CO}_2 = 3\text{ mol mol}^{-1}$ ;  $\text{GHSV} = 12000\text{ Ncm}^3\text{ g}_{\text{cat}}^{-1}\text{ h}^{-1}$ .

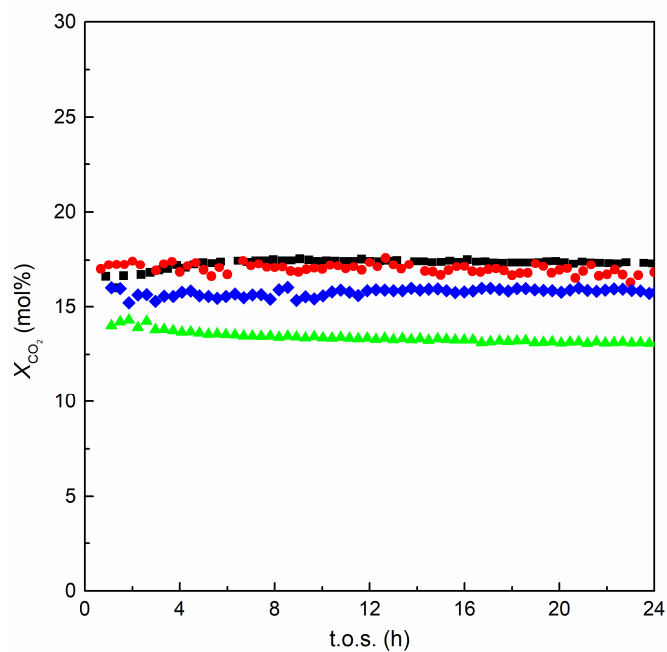

**Figure S5.** CO<sub>2</sub> conversion as a function of time on stream for the CO<sub>2</sub> conversion into DME on the ex-LDH/FER\_20 bifunctional catalysts: (■), CuZnAl/FER\_20; (●), CuZnAlZr/FER\_20; (▲), CuZnAlCe/FER\_20; (◆), CuZnAlZrCe/FER\_20. Reaction conditions:  $T = 250\text{ }^{\circ}\text{C}$ ;  $P = 3.0\text{ MPa}$ ;  $\text{H}_2/\text{CO}_2 = 3\text{ mol mol}^{-1}$ ;  $\text{GHSV} = 6000\text{ Ncm}^3\text{ g}_{\text{cat}}^{-1}\text{ h}^{-1}$ .

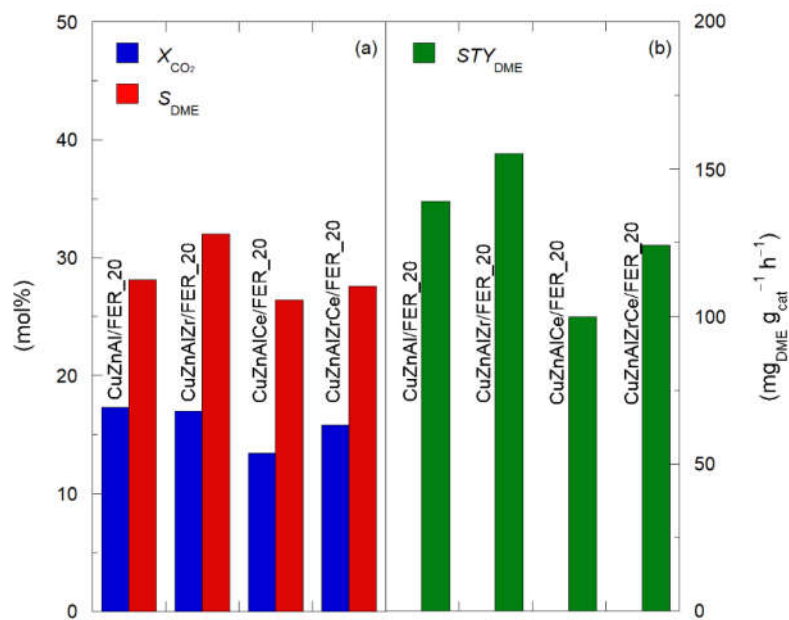

**Figure S6.** Catalytic results (average values over 24 hours on stream) for CO<sub>2</sub> hydrogenation to DME on ex-LDH/FER\_20 bifunctional systems. Reaction conditions:  $T = 250\text{ }^{\circ}\text{C}$ ;  $P = 3.0\text{ MPa}$ ;  $\text{H}_2/\text{CO}_2 = 3\text{ mol mol}^{-1}$ ;  $\text{GHSV} = 6000\text{ Ncm}^3\text{ g}_{\text{cat}}^{-1}\text{ h}^{-1}$ .

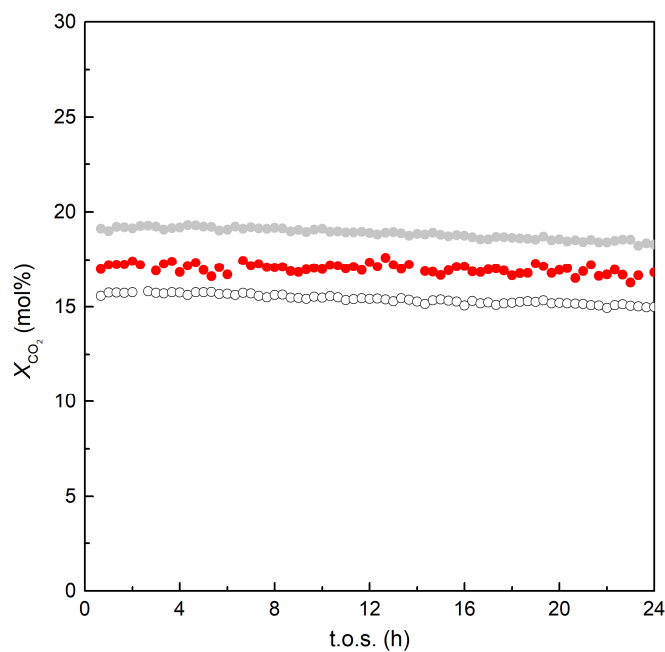

**Figure S7.** CO<sub>2</sub> conversion as a function of time on stream for the CO<sub>2</sub> conversion into DME on the CuZnAlZr/FER\_20 and CuZnAlZr/ZSM5 bifunctional catalysts: (●), CuZnAlZr/FER\_20; (○), CuZnAlZr/ZSM5\_23; (●), CuZnAlZr/ZSM5\_350. Reaction conditions:  $T = 250\text{ }^{\circ}\text{C}$ ;  $P = 3.0\text{ MPa}$ ;  $\text{H}_2/\text{CO}_2 = 3\text{ mol mol}^{-1}$ ;  $\text{GHSV} = 6000\text{ Ncm}^3\text{ g}_{\text{cat}}^{-1}\text{ h}^{-1}$ .

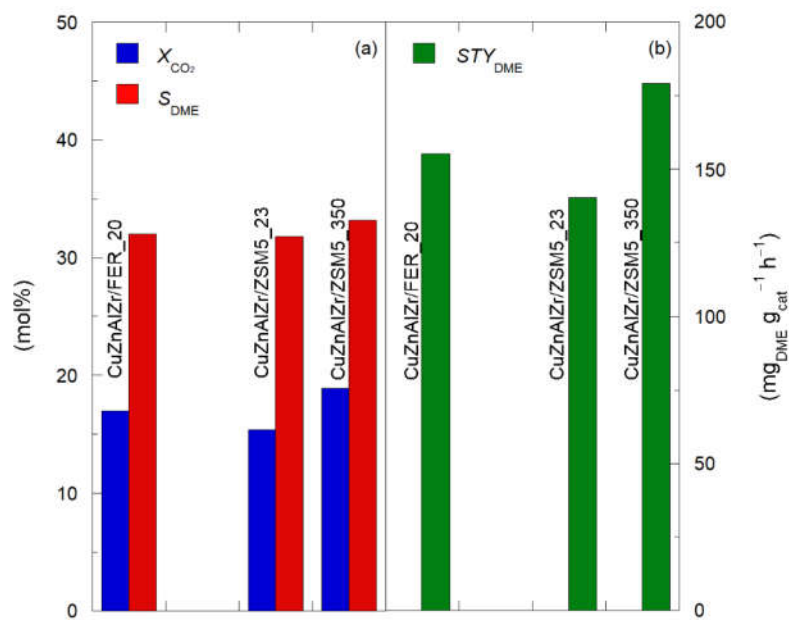

**Figure S8.** Catalytic results (average values over 24 hours on stream) for CO<sub>2</sub> hydrogenation to DME on the CuZnAlZr/FER\_20 and CuZnAlZr/ZSM5 bifunctional catalysts. Reaction conditions:  $T = 250\text{ }^{\circ}\text{C}$ ;  $P = 3.0\text{ MPa}$ ;  $\text{H}_2/\text{CO}_2 = 3\text{ mol mol}^{-1}$ ;  $\text{GHSV} = 6000\text{ Ncm}^3\text{ g}_{\text{cat}}^{-1}\text{ h}^{-1}$ .
